# Supplementary material for: A UPLC-MS-based metabolomics approach to reveal the attenuation mechanism of Caowu compatibility with Yunnan Baiyao
Source: Royal Society of Chemistry journal article supplement (doi:10.1039/c8ra09894h), 2019-01-01

**Table S1** Identification of potential toxicity biomarkers by MS/MS

| NO. | Rt   | m/z determined | m/z calculated | Error (ppm) | Ion form            | Molecular Formula                                             | Metabolite Name              | MS/MS                                   |
|-----|------|----------------|----------------|-------------|---------------------|---------------------------------------------------------------|------------------------------|-----------------------------------------|
| 1   | 0.65 | 175.1190       | 175.1189       | 0.4         | [M+H] <sup>+</sup>  | C <sub>6</sub> H <sub>14</sub> N <sub>4</sub> O <sub>2</sub>  | D-Arginine                   | 158.0942/129.0972/<br>112.0866/70.0656  |
| 2   | 0.66 | 203.0528       | 203.0526       | 0.8         | [M+Na] <sup>+</sup> | C <sub>6</sub> H <sub>12</sub> O <sub>6</sub>                 | 3-Deoxyarabinohexonic acid   | 145.0473/85.0279                        |
| 3   | 0.75 | 176.1030       | 176.1029       | 0.7         | [M+H] <sup>+</sup>  | C <sub>6</sub> H <sub>13</sub> N <sub>3</sub> O <sub>3</sub>  | Argininic acid               | 158.0884/130.0925/<br>70.0637           |
| 4   | 0.78 | 204.1234       | 204.1230       | 1.7         | [M+H] <sup>+</sup>  | C <sub>9</sub> H <sub>17</sub> NO <sub>4</sub>                | L-Acetylcarnitine            | 158.1258/144.1029/<br>85.0278           |
| 5   | 0.91 | 116.0708       | 116.0706       | 1.4         | [M+H] <sup>+</sup>  | C <sub>5</sub> H <sub>9</sub> NO <sub>2</sub>                 | D-Proline                    | 116.0709/98.0838/<br>70.0622            |
| 6   | 2.85 | 261.1446       | 261.1444       | 0.4         | [M+H] <sup>+</sup>  | C <sub>11</sub> H <sub>20</sub> N <sub>2</sub> O <sub>5</sub> | L-γ-glutamyl-L-leucine       | 244.1302/198.1122/<br>130.0509          |
| 7   | 5.34 | 373.1985       | 373.1985       | -0.2        | [M+Na] <sup>+</sup> | C <sub>20</sub> H <sub>30</sub> O <sub>5</sub>                | Prostaglandin E <sub>3</sub> | 502.3292/443.2432/<br>315.2165/233.1172 |
| 8   | 5.94 | 449.2183       | 449.2169       | 2.9         | [M+H] <sup>+</sup>  | C <sub>24</sub> H <sub>32</sub> O <sub>8</sub>                | 17-α-Estradiol-3-glucuronide | 413.1964/215.1786                       |
| 9   | 6.70 | 282.2795       | 282.2791       | 1.2         | [M+H] <sup>+</sup>  | C <sub>18</sub> H <sub>35</sub> NO                            | Oleamide                     | 264.2624/239.2760/<br>209.1614          |
| 10  | 7.01 | 518.3241       | 518.3241       | -0.1        | [M+H] <sup>+</sup>  | C <sub>26</sub> H <sub>48</sub> NO <sub>7</sub> P             | LysoPC(18:3)                 | 500.3081/184.0730/<br>124.9987          |
| 11  | 7.34 | 482.3177       | 482.3241       | 1.7         | [M+H] <sup>+</sup>  | C <sub>23</sub> H <sub>48</sub> NO <sub>7</sub> P             | LysoPE(18:0)                 | 464.3096/339.2731/<br>225.2174          |
| 12  | 7.51 | 542.3228       | 542.3241       | -2.3        | [M+H] <sup>+</sup>  | C <sub>28</sub> H <sub>48</sub> NO <sub>7</sub> P             | LysoPC(20:5)                 | 524.3213/184.0725                       |

|    |       |          |          |      |                     |                                                   |                                                       |                                         |
|----|-------|----------|----------|------|---------------------|---------------------------------------------------|-------------------------------------------------------|-----------------------------------------|
| 13 | 7.84  | 774.5041 | 774.5044 | -0.4 | [M+Na] <sup>+</sup> | C <sub>42</sub> H <sub>74</sub> NO <sub>8</sub> P | PC(14:0/20:5)                                         | 184.0642/104.1075                       |
| 14 | 7.92  | 494.3244 | 494.3241 | 0.6  | [M+H] <sup>+</sup>  | C <sub>24</sub> H <sub>48</sub> NO <sub>7</sub> P | LysoPC(16:1)                                          | 478.3249/184.0732                       |
| 15 | 8.22  | 570.3566 | 570.3554 | 2.1  | [M+H] <sup>+</sup>  | C <sub>30</sub> H <sub>52</sub> NO <sub>7</sub> P | LysoPC(22:5)                                          | 552.3343/184.0725                       |
| 16 | 8.28  | 431.3150 | 431.3155 | -1.4 | [M+H] <sup>+</sup>  | C <sub>27</sub> H <sub>42</sub> O <sub>4</sub>    | 24-Oxo-1 $\alpha$ ,25-dihydroxyvitamin D <sub>3</sub> | 413.2956/395.2835/<br>269.1863/121.0719 |
| 17 | 8.38  | 522.3566 | 522.3554 | 2.2  | [M+H] <sup>+</sup>  | C <sub>26</sub> H <sub>52</sub> NO <sub>7</sub> P | LysoPC(18:1)                                          | 504.3400/339.2873/<br>258.1079/184.0726 |
| 18 | 9.04  | 536.3711 | 536.3710 | 0.1  | [M+H] <sup>+</sup>  | C <sub>27</sub> H <sub>54</sub> NO <sub>7</sub> P | LysoPE(22:1)                                          | 518.3781/395.3268                       |
| 19 | 9.38  | 782.5701 | 782.5694 | 0.9  | [M+H] <sup>+</sup>  | C <sub>44</sub> H <sub>80</sub> NO <sub>8</sub> P | PC(16:0/20:4)                                         | 723.4807/599.4752/<br>184.0733          |
| 20 | 9.73  | 549.3807 | 549.3788 | 2.2  | [M+H] <sup>-</sup>  | C <sub>28</sub> H <sub>56</sub> NO <sub>7</sub> P | LysoPC(20:1)                                          | 532.2589/367.3019/<br>293.2693/184.0663 |
| 21 | 10.62 | 780.5528 | 780.5537 | -1.1 | [M+H] <sup>+</sup>  | C <sub>44</sub> H <sub>78</sub> NO <sub>8</sub> P | PC(16:1/20:4)                                         | 721.4694/597.4785/<br>184.0727/86.0964  |
| 22 | 10.91 | 832.5843 | 832.5850 | -0.9 | [M+H] <sup>+</sup>  | C <sub>48</sub> H <sub>82</sub> NO <sub>8</sub> P | PC(18:1/22:6)                                         | 773.5029/649.5125/<br>184.0737          |
| 23 | 10.91 | 760.5837 | 760.2850 | -1.8 | [M+H] <sup>+</sup>  | C <sub>42</sub> H <sub>82</sub> NO <sub>8</sub> P | PC(18:0/16:1)                                         | 577.5287/86.0967                        |
| 24 | 10.91 | 756.5533 | 756.5537 | -0.6 | [M+H] <sup>+</sup>  | C <sub>42</sub> H <sub>78</sub> NO <sub>8</sub> P | PC(16:0/18:3)                                         | 698.4711/573.4726/<br>313.2736/240.0968 |
| 25 | 11.16 | 512.5029 | 512.5037 | -1.5 | [M+H] <sup>-</sup>  | C <sub>32</sub> H <sub>65</sub> NO <sub>3</sub>   | Cer(d18:0/14:0)                                       | 494.4837/266.3042                       |
| 26 | 11.19 | 836.6157 | 836.6163 | -0.8 | [M+H] <sup>+</sup>  | C <sub>48</sub> H <sub>86</sub> NO <sub>8</sub> P | PC(18:0/22:5)                                         | 778.6121/508.3563/<br>184.0729          |
| 27 | 11.50 | 209.1149 | 209.1148 | 0.6  | [M+Na] <sup>+</sup> | C <sub>10</sub> H <sub>18</sub> O <sub>3</sub>    | 3-Oxodecanoic acid                                    | 170.9921/126.9539/<br>100.9553/85.9345  |
| 28 | 11.53 | 927.7401 | 927.7436 | -3.8 | [M+H] <sup>+</sup>  | C <sub>61</sub> H <sub>98</sub> O <sub>6</sub>    | TG(16:0/22:6/20:4)                                    | 623.4839/599.5016                       |
| 29 | 11.53 | 772.5830 | 772.5850 | -2.7 | [M+H] <sup>+</sup>  | C <sub>43</sub> H <sub>82</sub> NO <sub>8</sub> P | PE(18:0/20:2)                                         | 631.4818/341.0298                       |

|    |       |          |          |      |                    |                                                               |                                             |                                                              |
|----|-------|----------|----------|------|--------------------|---------------------------------------------------------------|---------------------------------------------|--------------------------------------------------------------|
| 30 | 11.53 | 786.6010 | 786.6007 | 0.4  | [M+H] <sup>+</sup> | C <sub>44</sub> H <sub>84</sub> NO <sub>8</sub> P             | PC(18:0/18:2)                               | 502.3232/184.0729                                            |
| 31 | 11.75 | 339.1809 | 339.1802 | 2.0  | [M+H] <sup>+</sup> | C <sub>18</sub> H <sub>26</sub> O <sub>6</sub>                | ω-Carboxy-trinor-leukotriene B <sub>4</sub> | 321.1131/303.1949/<br>261.1527/135.0148                      |
| 32 | 0.70  | 130.0509 | 130.0498 | -0.8 | [M-H] <sup>-</sup> | C <sub>5</sub> H <sub>9</sub> NO <sub>3</sub>                 | 4-Hydroxy-L-proline                         | 114.0231/71.0129                                             |
| 33 | 1.58  | 167.0209 | 167.0199 | -1.1 | [M-H] <sup>-</sup> | C <sub>5</sub> H <sub>4</sub> N <sub>4</sub> O <sub>3</sub>   | Uric acid                                   | 502.3292/443.2432/<br>124.0177/96.0205/<br>69.0086           |
| 34 | 2.09  | 163.0396 | 163.0389 | -2.8 | [M-H] <sup>-</sup> | C <sub>9</sub> H <sub>8</sub> O <sub>3</sub>                  | Phenylpyruvic acid                          | 145.0912/119.0515/<br>93.0389                                |
| 35 | 2.10  | 180.0663 | 180.0655 | -1.7 | [M-H] <sup>-</sup> | C <sub>9</sub> H <sub>11</sub> NO <sub>3</sub>                | L-Tyrosine                                  | 478.3292/313.2738/<br>163.0410/119.4511/<br>72.0072          |
| 36 | 2.47  | 137.0245 | 137.0233 | 0.7  | [M-H] <sup>-</sup> | C <sub>7</sub> H <sub>6</sub> O <sub>3</sub>                  | Gentisate aldehyde                          | 553.2783/281.2486/<br>120.9430/118.9419/<br>107.0399/53.4798 |
| 37 | 2.52  | 164.0714 | 164.0706 | -1.6 | [M-H] <sup>-</sup> | C <sub>9</sub> H <sub>11</sub> NO <sub>2</sub>                | L-Phenylalanine                             | 147.0447/103.0554/<br>96.8230                                |
| 38 | 2.84  | 159.0923 | 159.0916 | -2.7 | [M-H] <sup>-</sup> | C <sub>10</sub> H <sub>12</sub> N <sub>2</sub>                | Tryptamine                                  | 142.0911/130.0650/<br>116.0513/71.0393                       |
| 39 | 2.84  | 203.0825 | 203.0815 | -0.7 | [M-H] <sup>-</sup> | C <sub>11</sub> H <sub>12</sub> N <sub>2</sub> O <sub>2</sub> | D-Tryptophan                                | 186.0564/159.0928/<br>142.0665/74.0247                       |
| 40 | 4.37  | 201.1125 | 201.1121 | -3.5 | [M-H] <sup>-</sup> | C <sub>10</sub> H <sub>18</sub> O <sub>4</sub>                | Heptylmalonic acid                          | 157.1213/139.1105/<br>111.0793/109.0628                      |
| 41 | 5.51  | 498.2887 | 498.2883 | -1.6 | [M-H] <sup>-</sup> | C <sub>26</sub> H <sub>45</sub> NO <sub>6</sub> S             | Taurochenodesoxycholic acid                 | 329.2759/124.0053/<br>106.9784                               |
| 42 | 6.21  | 448.3064 | 448.3057 | -1.0 | [M-H] <sup>-</sup> | C <sub>26</sub> H <sub>43</sub> NO <sub>5</sub>               | Chenodeoxyglycocholic acid                  | 430.2969/404.3165/                                           |

|    |      |          |          |      |                    |                                                   |                         |  |                                                              |
|----|------|----------|----------|------|--------------------|---------------------------------------------------|-------------------------|--|--------------------------------------------------------------|
|    |      |          |          |      |                    |                                                   |                         |  | 402.3012/386.3039/<br>74.0251                                |
| 43 | 6.58 | 287.2015 | 287.2005 | -0.4 | [M-H] <sup>-</sup> | C <sub>19</sub> H <sub>28</sub> O <sub>2</sub>    | Dehydroepiandrosterone  |  | 271.1699/269.1859/<br>243.1954/215.1161                      |
| 44 | 6.64 | 378.2409 | 378.2403 | -1.5 | [M-H] <sup>-</sup> | C <sub>18</sub> H <sub>38</sub> NO <sub>5</sub> P | Sphingosine 1-phosphate |  | 333.2058/287.1999/<br>78.9569                                |
| 45 | 6.97 | 317.2116 | 317.2111 | -1.9 | [M-H] <sup>-</sup> | C <sub>20</sub> H <sub>30</sub> O <sub>3</sub>    | 5-HEPE                  |  | 299.2021/273.2095/<br>253.1959/69.0297                       |
| 46 | 7.09 | 253.2166 | 253.2162 | -3.0 | [M-H] <sup>-</sup> | C <sub>16</sub> H <sub>30</sub> O <sub>2</sub>    | Palmitoleic acid        |  | 235.2053/209.2298                                            |
| 47 | 7.11 | 466.2938 | 466.2928 | -0.3 | [M-H] <sup>-</sup> | C <sub>22</sub> H <sub>46</sub> NO <sub>7</sub> P | LysoPC(14:0)            |  | 184.0739                                                     |
| 48 | 7.37 | 391.2851 | 391.2842 | -0.7 | [M-H] <sup>-</sup> | C <sub>24</sub> H <sub>40</sub> O <sub>4</sub>    | Deoxycholic acid        |  | 373.2742/347.2954/<br>327.2696                               |
| 49 | 7.37 | 327.2320 | 327.2318 | -2.8 | [M-H] <sup>-</sup> | C <sub>22</sub> H <sub>32</sub> O <sub>2</sub>    | Docosahexaenoic acid    |  | 297.1835/283.2448/<br>267.2113/59.0130                       |
| 50 | 7.87 | 452.2777 | 452.2771 | -1.3 | [M-H] <sup>-</sup> | C <sub>21</sub> H <sub>44</sub> NO <sub>7</sub> P | LysoPE(16:0)            |  | 409.3082/255.2337/<br>214.0484/196.0384/<br>152.9967/78.9587 |
| 51 | 8.14 | 281.2479 | 281.2475 | -2.6 | [M-H] <sup>-</sup> | C <sub>18</sub> H <sub>34</sub> O <sub>2</sub>    | Oleic acid              |  | 265.2165/237.2220/<br>59.0133                                |
| 52 | 8.26 | 478.2931 | 478.2928 | -1.7 | [M-H] <sup>-</sup> | C <sub>23</sub> H <sub>46</sub> NO <sub>7</sub> P | LysoPE(18:1)            |  | 460.3160/281.2489/<br>263.2357/196.0380/<br>122.0015         |
| 53 | 8.29 | 436.2826 | 436.2822 | -1.8 | [M-H] <sup>-</sup> | C <sub>21</sub> H <sub>44</sub> NO <sub>6</sub> P | PE(P-16:0e/0:0)         |  | 393.2413/375.2305/<br>239.2385/196.0386/<br>140.0122         |
| 54 | 8.35 | 417.2400 | 417.2400 | 0    | [M-H] <sup>-</sup> | C <sub>21</sub> H <sub>39</sub> O <sub>6</sub> P  | CPA(18:1)               |  | 399.2482/281.2473/                                           |

|    |       |          |          |      |                    |                                                                  |                           |                                                                                                                                                         |
|----|-------|----------|----------|------|--------------------|------------------------------------------------------------------|---------------------------|---------------------------------------------------------------------------------------------------------------------------------------------------------|
| 55 | 9.45  | 283.2639 | 283.2631 | -1.2 | [M-H] <sup>-</sup> | C <sub>18</sub> H <sub>36</sub> O <sub>2</sub>                   | Stearic acid              | 152.9933/134.9817<br>267.2540/211.2125/<br>594.3717/508.2411/<br>367.1596                                                                               |
| 56 | 9.49  | 640.2911 | 640.2898 | 0.2  | [M-H] <sup>-</sup> | C <sub>30</sub> H <sub>47</sub> N <sub>3</sub> O <sub>10</sub> S | 12-Oxo-c-LTB <sub>3</sub> | 281.2484/253.1532/<br>437.2664/419.2626/<br>283.2611/78.9599<br>528.3095/457.2360/<br>283.2463/271.2277/<br>255.2224/<br>259.2085/241.1066/<br>233.2065 |
| 57 | 9.53  | 299.2011 | 299.2005 | -1.9 | [M-H] <sup>-</sup> | C <sub>20</sub> H <sub>28</sub> O <sub>2</sub>                   | 4-OH-Retinal              | 261.2205/59.0139<br>311.2379/285.2589/<br>267.2349/203.1787/<br>237.2170/213.2682                                                                       |
| 58 | 9.97  | 522.3554 | 522.3554 | -2.1 | [M-H] <sup>-</sup> | C <sub>26</sub> H <sub>54</sub> NO <sub>7</sub> P                | LysoPC(18:0)              |                                                                                                                                                         |
| 59 | 10.17 | 301.2166 | 301.2162 | -2.4 | [M-H] <sup>-</sup> | C <sub>20</sub> H <sub>30</sub> O <sub>2</sub>                   | Isopimaric acid           |                                                                                                                                                         |
| 60 | 10.34 | 277.2166 | 277.2162 | -2.4 | [M-H] <sup>-</sup> | C <sub>18</sub> H <sub>30</sub> O <sub>2</sub>                   | Linolenelaidic acid       |                                                                                                                                                         |
| 61 | 10.90 | 279.2324 | 279.2318 | -1.8 | [M-H] <sup>-</sup> | C <sub>18</sub> H <sub>32</sub> O <sub>2</sub>                   | Linoleic acid             |                                                                                                                                                         |
| 62 | 11.16 | 329.2480 | 329.2475 | -1.8 | [M-H] <sup>-</sup> | C <sub>22</sub> H <sub>34</sub> O <sub>2</sub>                   | Docosapentaenoic acid     |                                                                                                                                                         |
| 63 | 11.52 | 255.2322 | 255.2318 | -2.9 | [M-H] <sup>-</sup> | C <sub>16</sub> H <sub>32</sub> O <sub>2</sub>                   | Isopalmitic acid          |                                                                                                                                                         |

**FIGURE S1** Representative photomicrographs of heart, liver, spleen, lung and kidney sections stained with hematoxylin-eosin in mice from control, CW, ZCW, YNBY, and QCW groups.

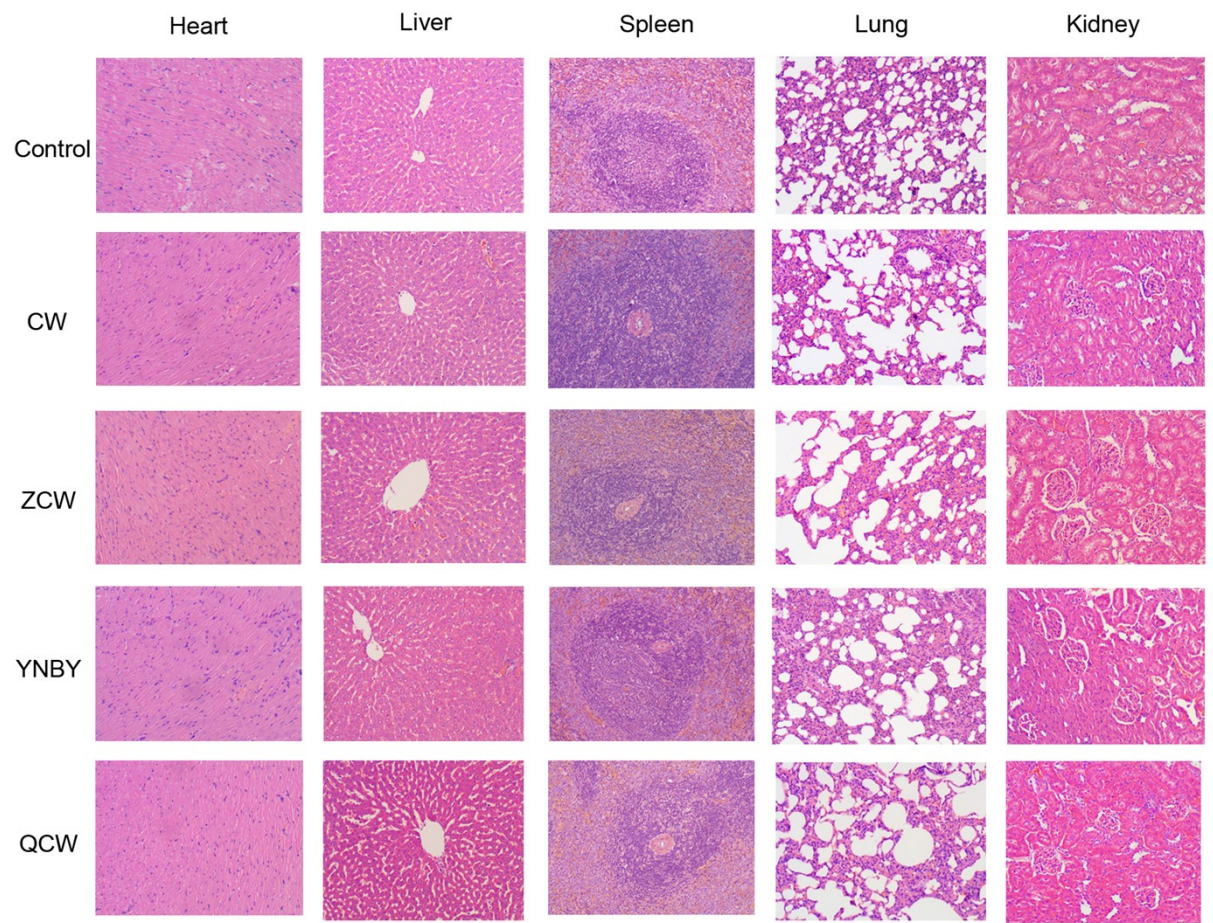

Supplement: c8ra09894h1.pdf [file c8ra09894h1.pdf]
